# Supplementary material for: Modulation of bacterial multicellularity via spatio-specific polysaccharide secretion
Source: PubMed Central journal article supplement (PMC7310880; doi:10.1371/journal.pbio.3000728), 2020-06-09

# EPS cluster

18 638 bp

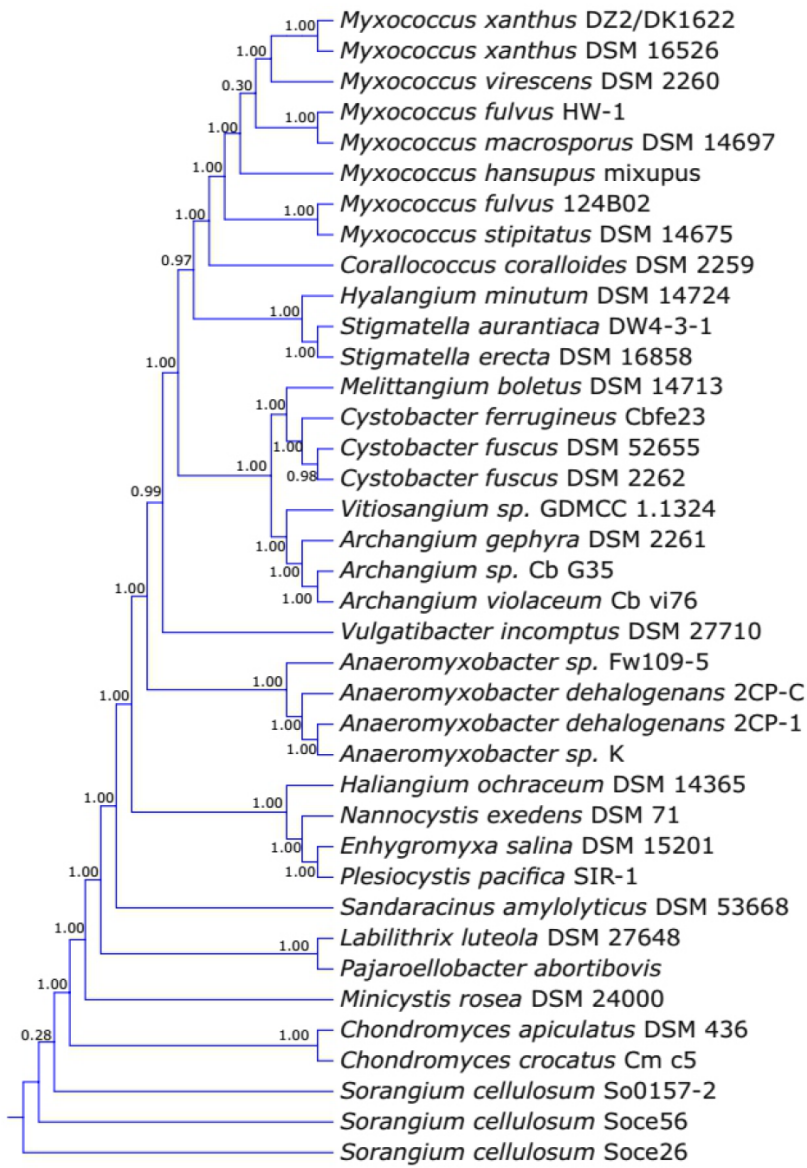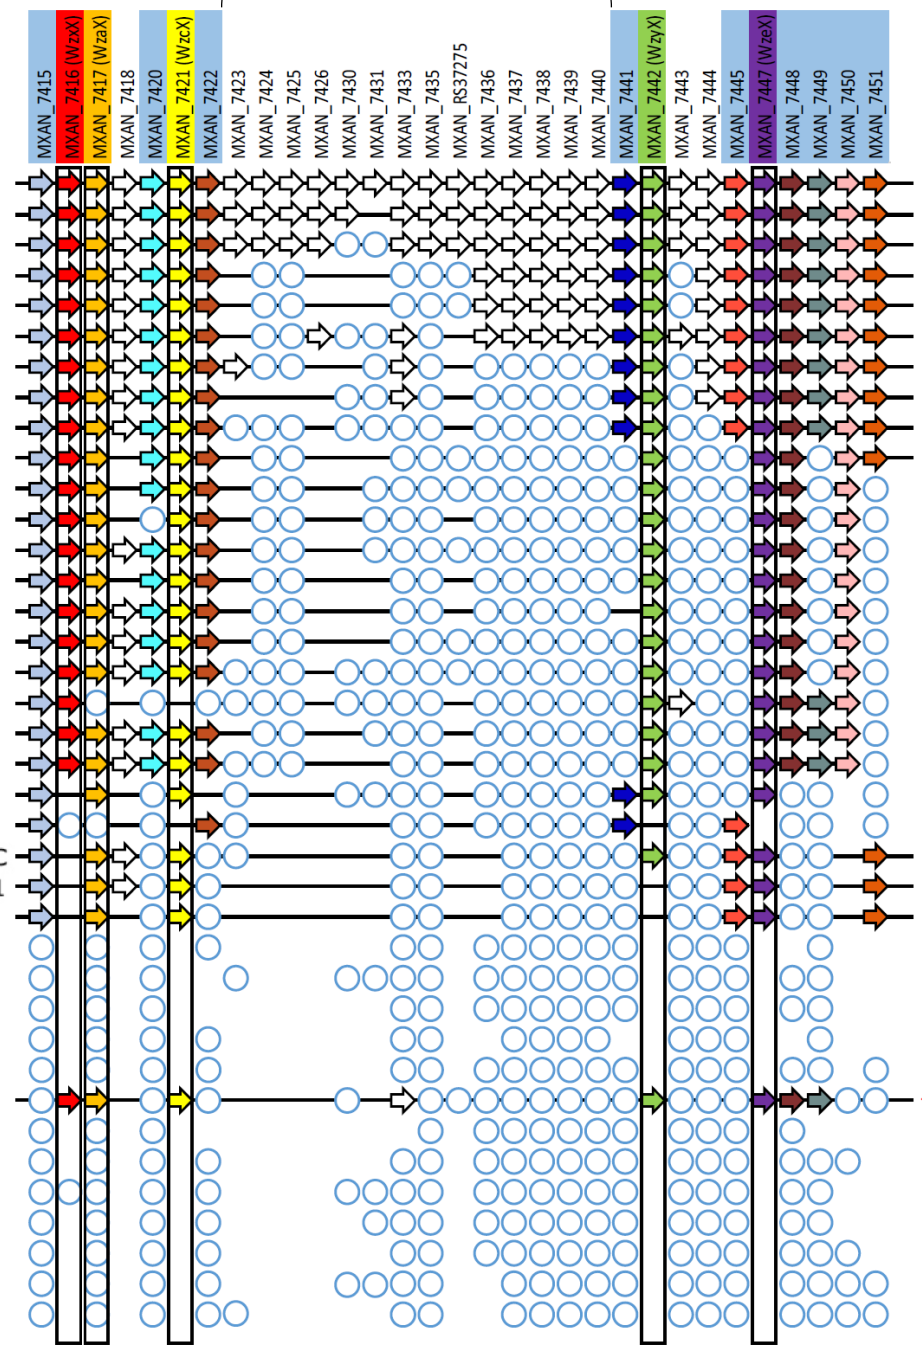

# MASC cluster

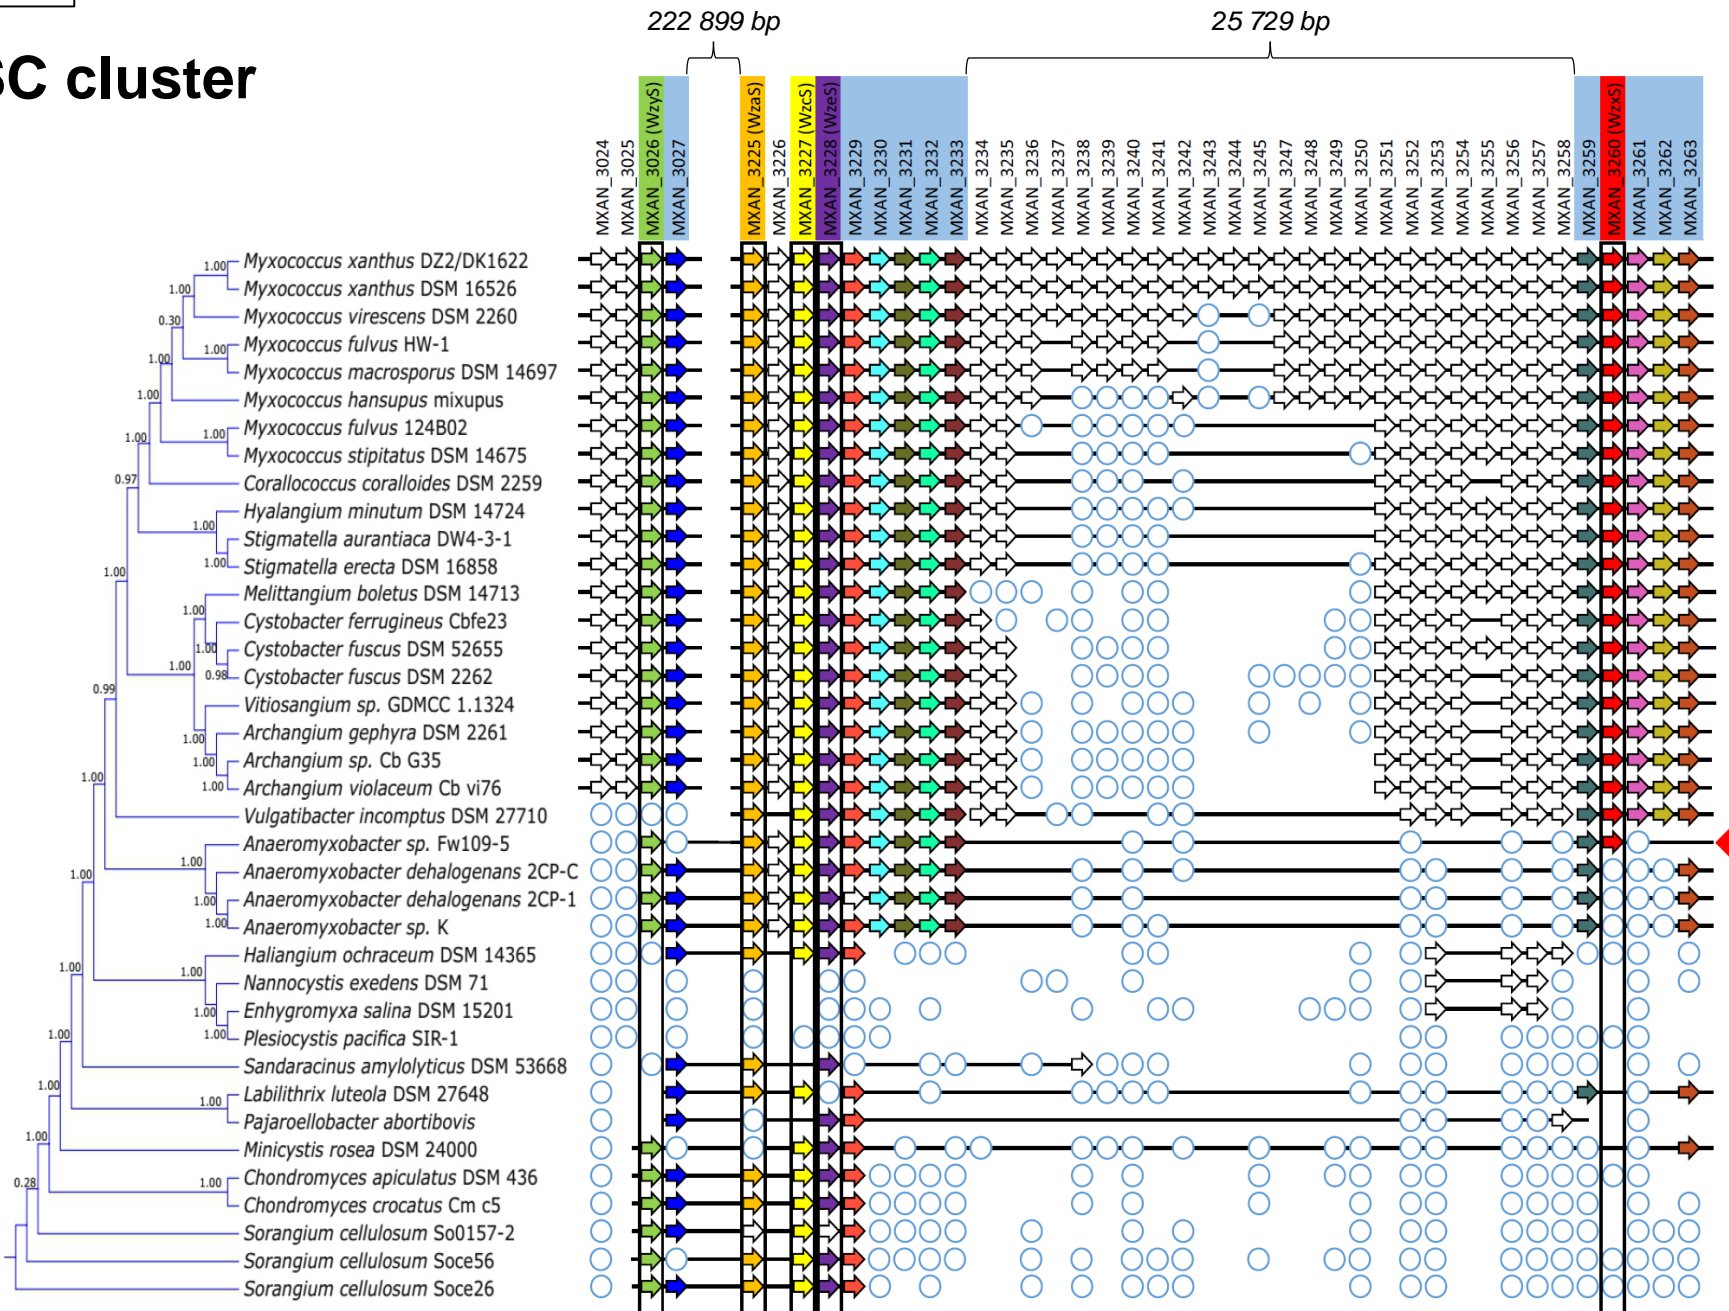

# BPS cluster

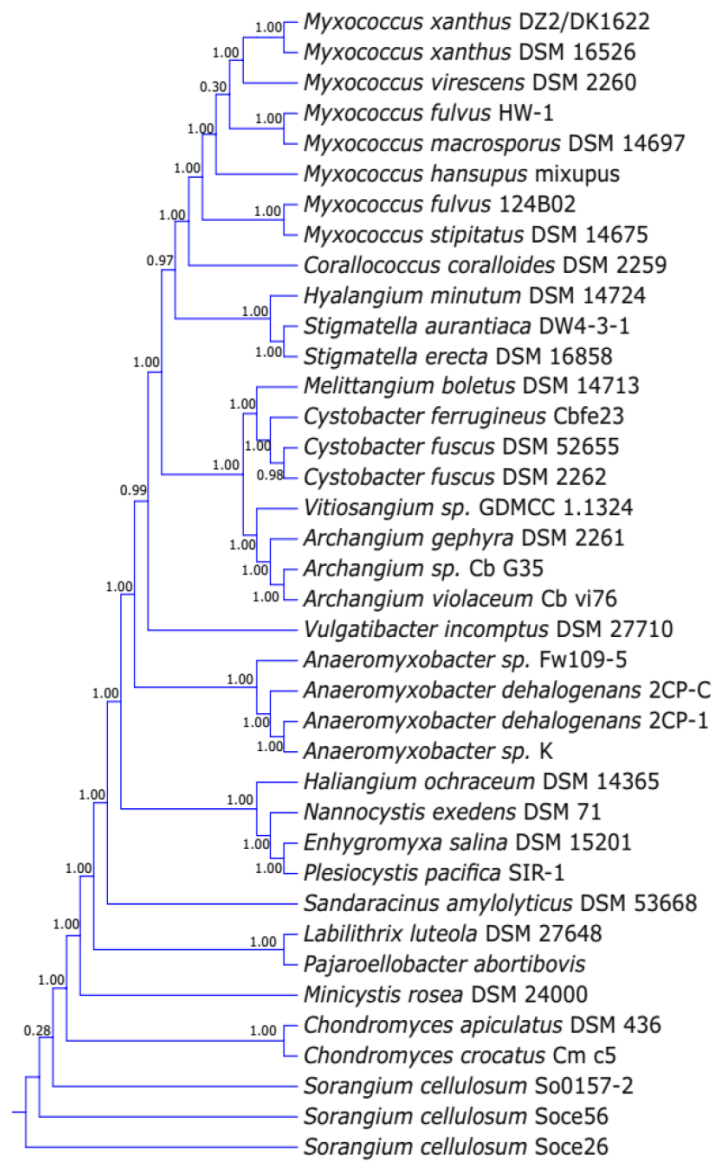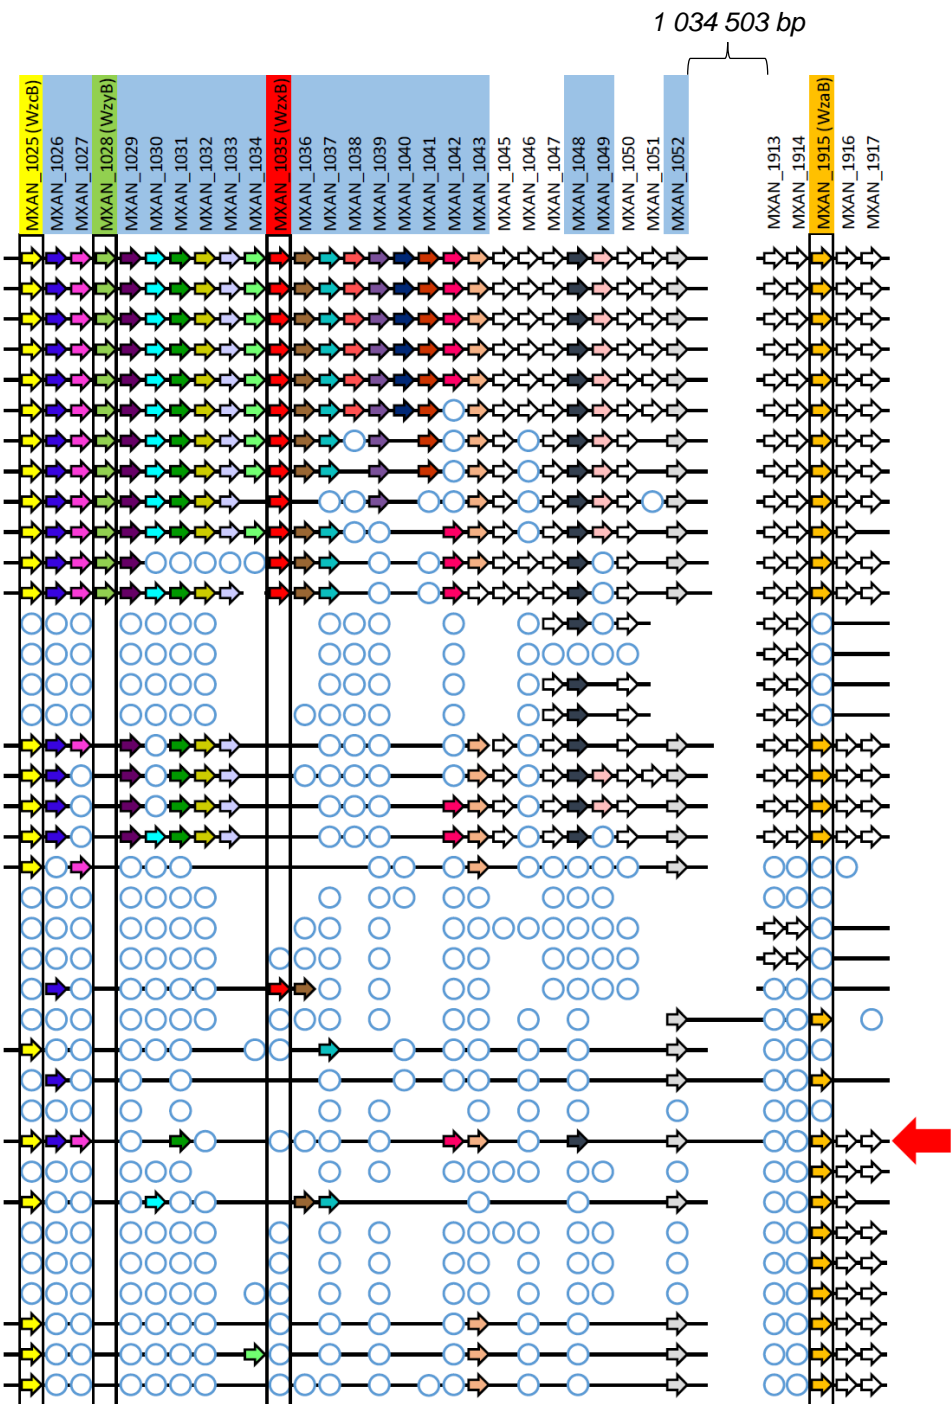

Supplement: pbio.3000728.s001.pdf [file pbio.3000728.s001.pdf]
