# Supplementary material for: Modulation of bacterial multicellularity via spatio-specific polysaccharide secretion
Source: PubMed Central journal article supplement (PMC7310880; doi:10.1371/journal.pbio.3000728), 2020-06-09

**A**

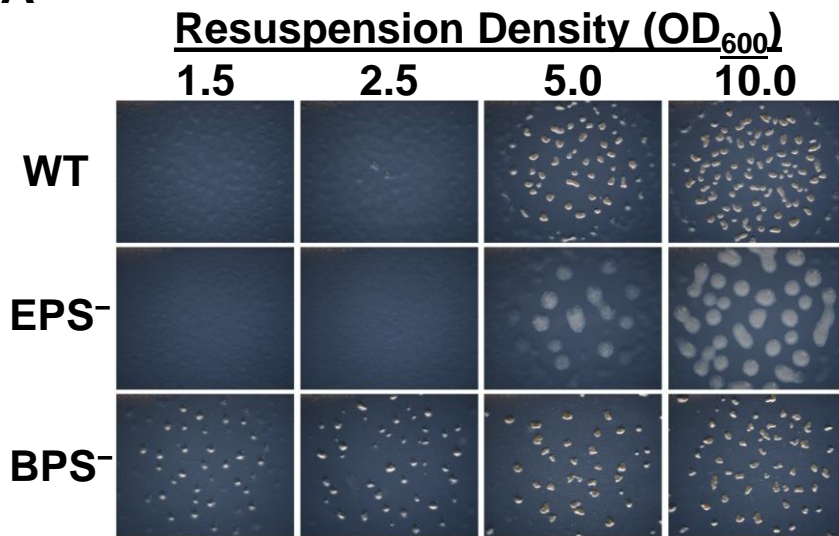

**B**

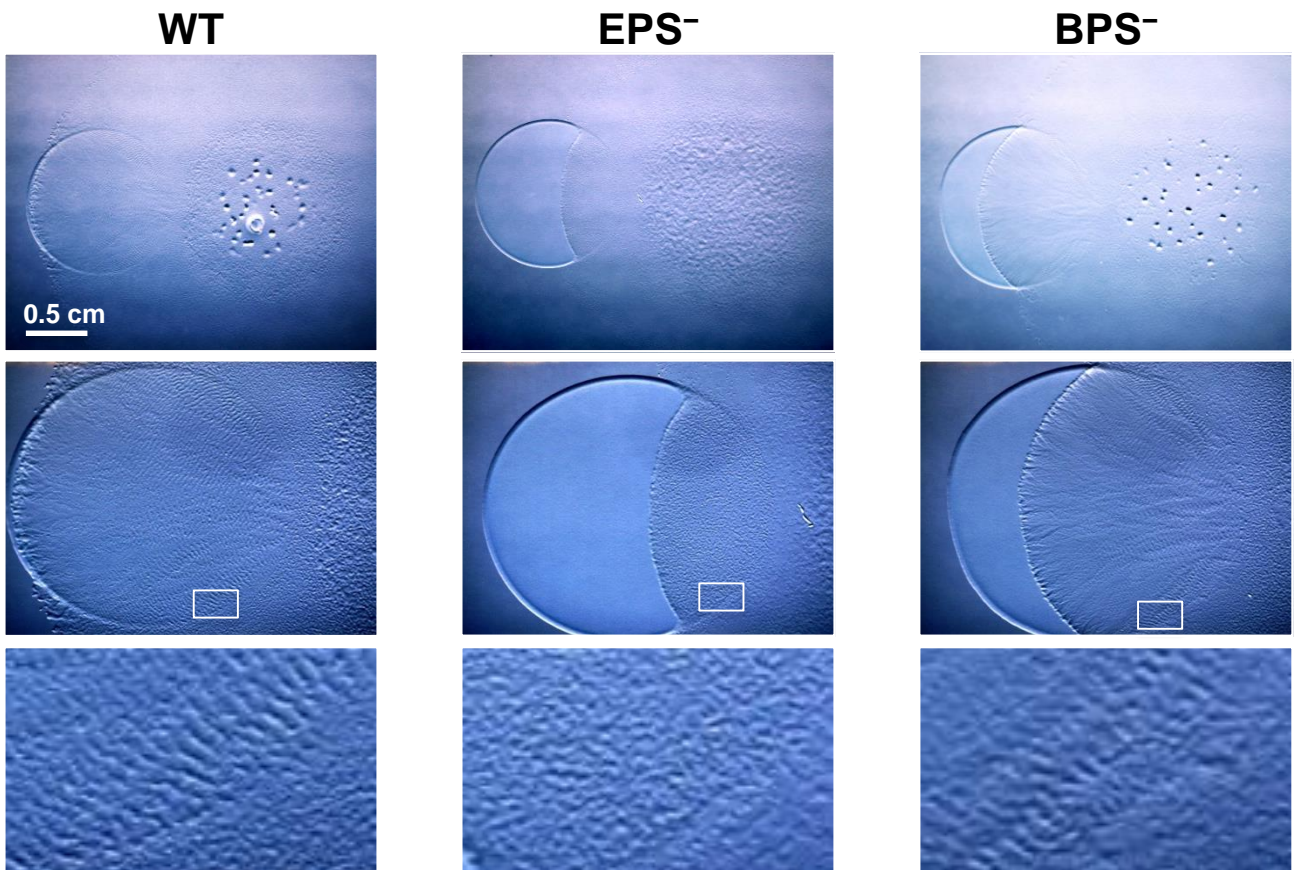

Supplement: pbio.3000728.s002.pdf [file pbio.3000728.s002.pdf]
