# Supplementary material for: Modulation of bacterial multicellularity via spatio-specific polysaccharide secretion
Source: PubMed Central journal article supplement (PMC7310880; doi:10.1371/journal.pbio.3000728), 2020-06-09

**Biofilm Monosaccharide Analysis**

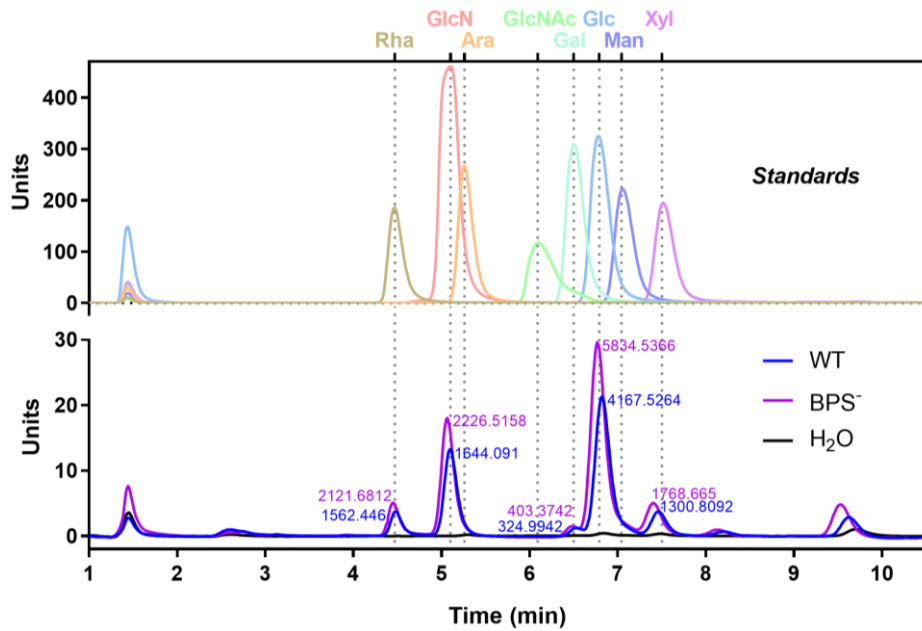

**B** **Effect of  $\Omega pilA$  Mutation on EPS Production**

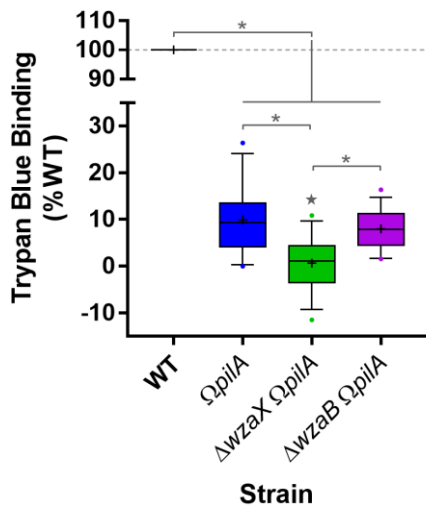

**C** **Surface Tension Decrease**

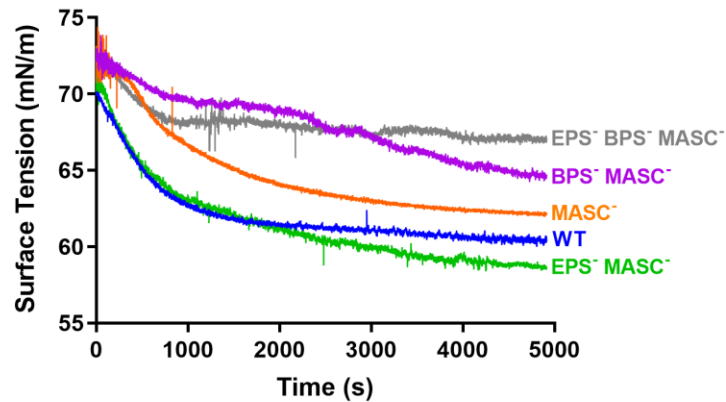

**D**

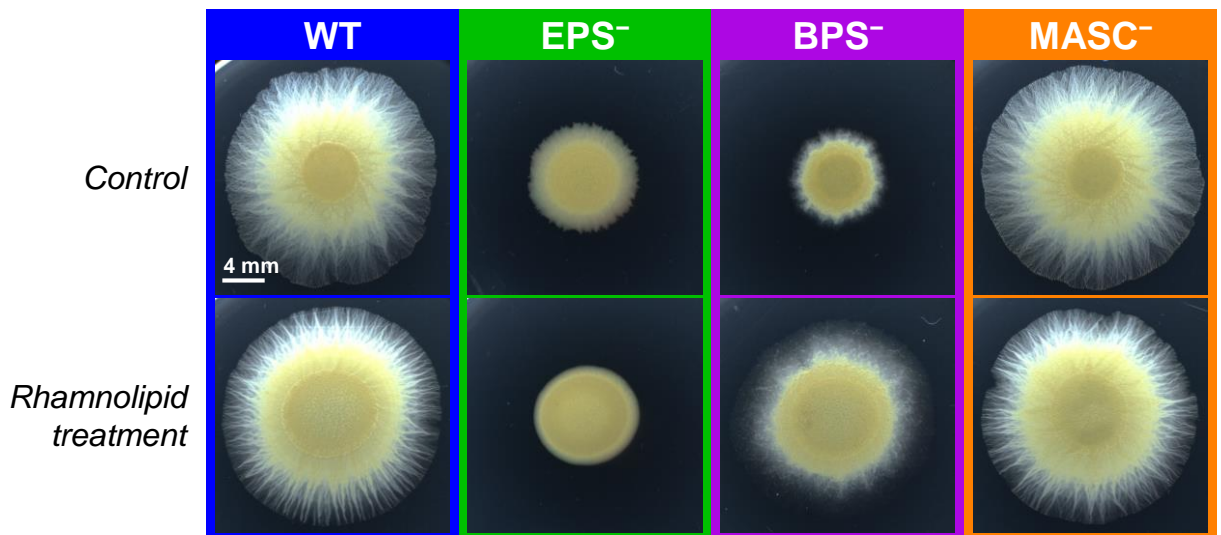

Supplement: pbio.3000728.s003.pdf [file pbio.3000728.s003.pdf]
