# Supplementary material for: Modulation of bacterial multicellularity via spatio-specific polysaccharide secretion
Source: PubMed Central journal article supplement (PMC7310880; doi:10.1371/journal.pbio.3000728), 2020-06-09

**A****Gel Chromatography**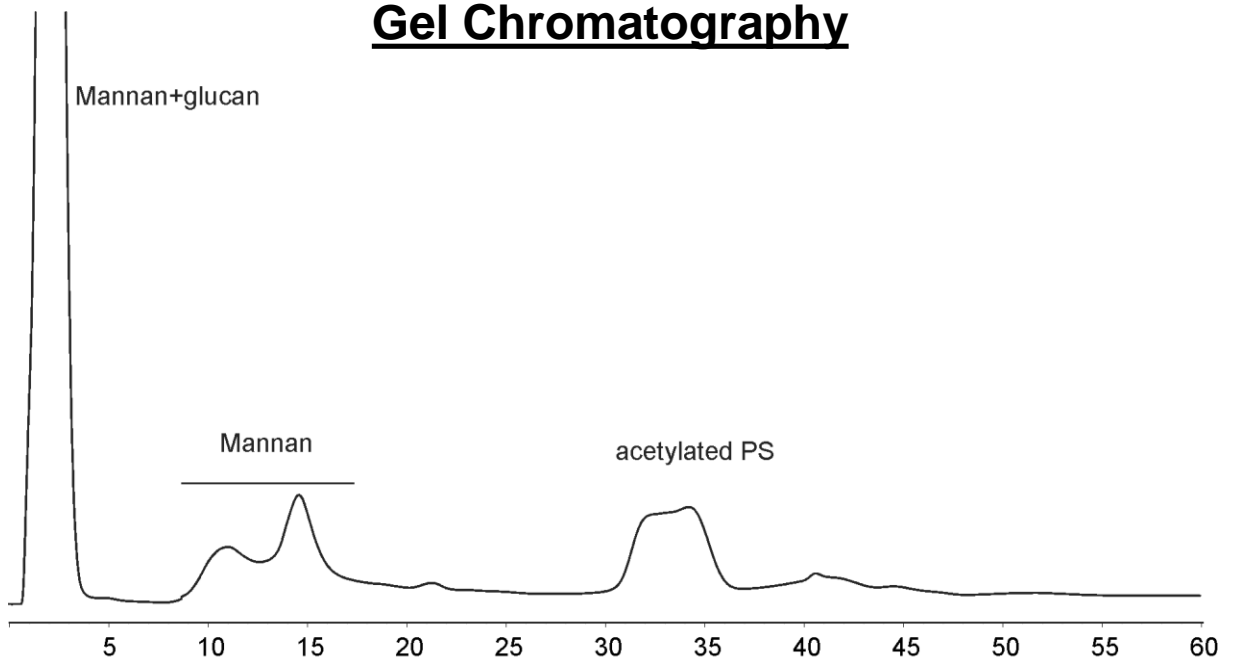**B** **$^1\text{H}$ - $^{13}\text{C}$  HSQC NMR**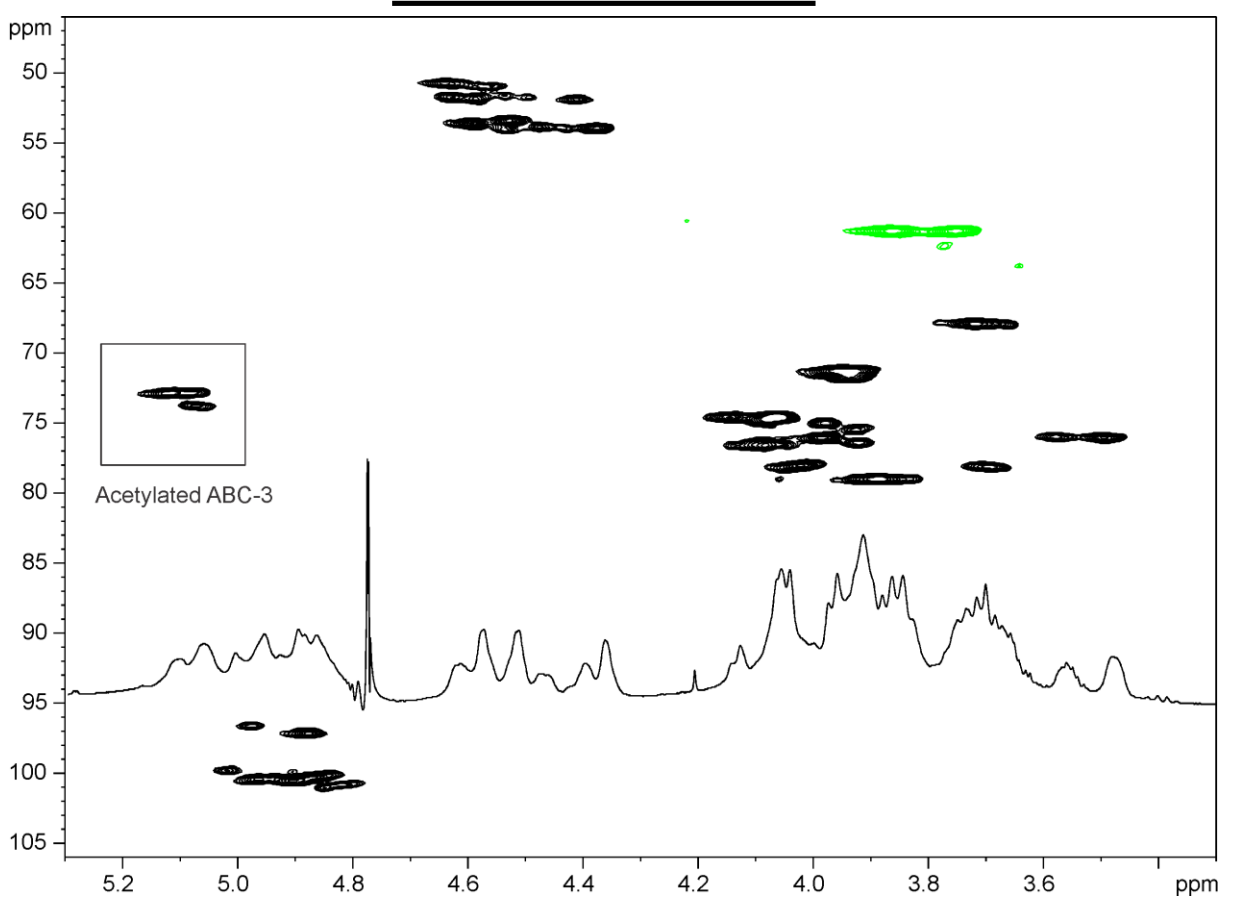

Supplement: pbio.3000728.s004.pdf [file pbio.3000728.s004.pdf]
