# Supplementary material for: Modulation of bacterial multicellularity via spatio-specific polysaccharide secretion
Source: PubMed Central journal article supplement (PMC7310880; doi:10.1371/journal.pbio.3000728), 2020-06-09

A

$P_{EPS}$ -sfGFP

$P_{BPS}$ -mCherry

Composite

0 h

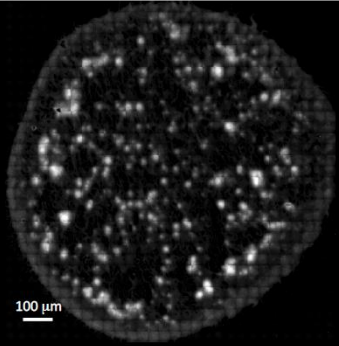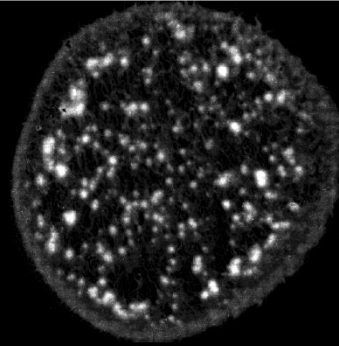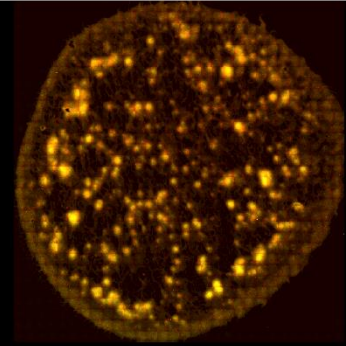

24 h

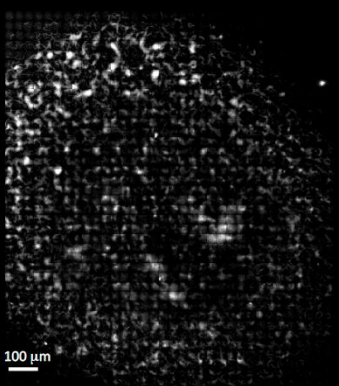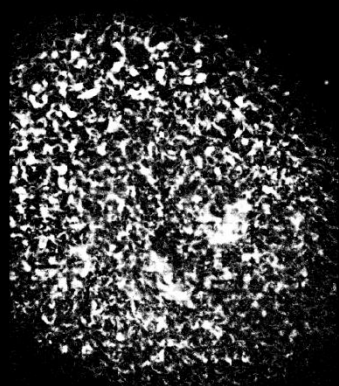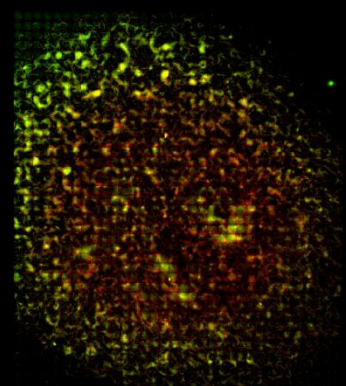

48 h

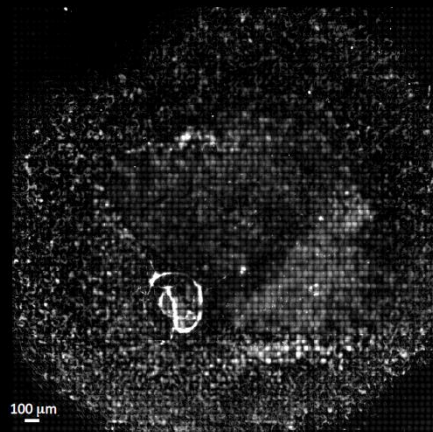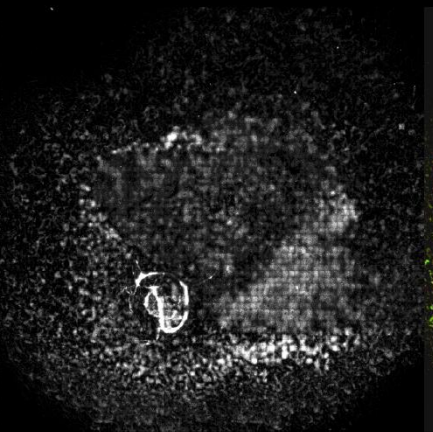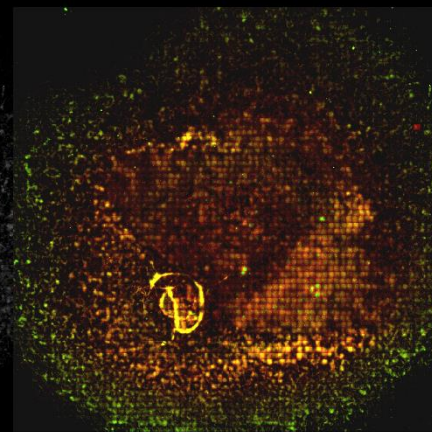

72 h

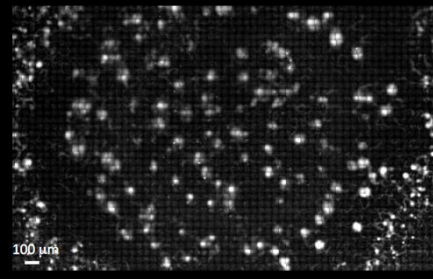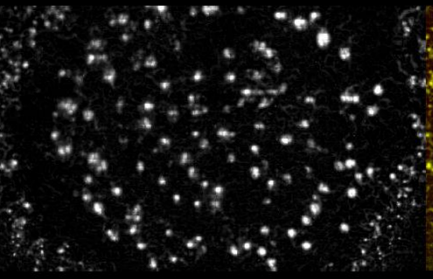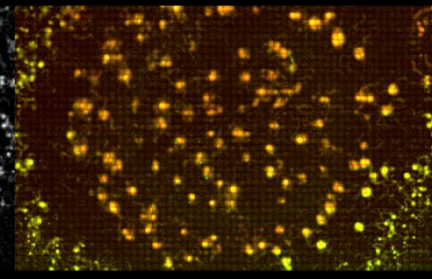

100  $\mu$ m

100  $\mu$ m

100  $\mu$ m

100  $\mu$ m

B

$P_{EPS}$ -sfGFP

$P_{BPS}$ -mCherry

Composite

0 h

24 h

48 h

72 h

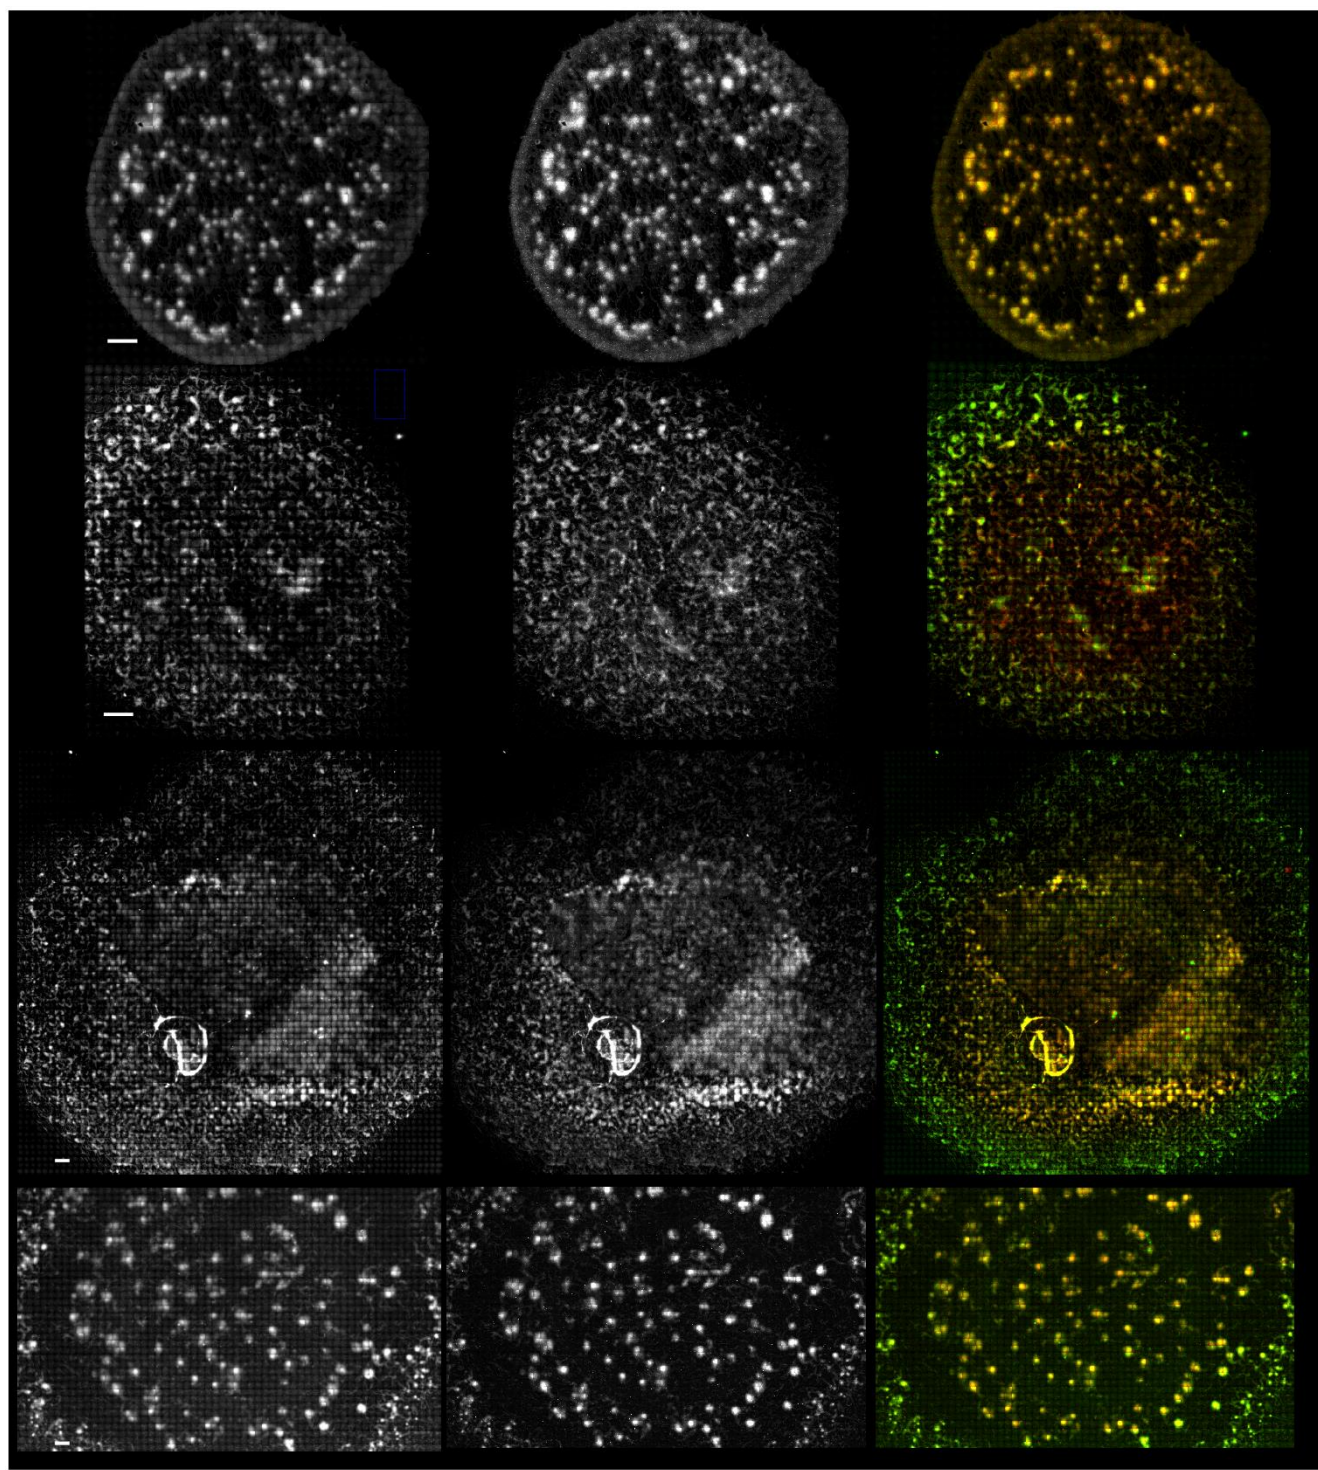

Supplement: pbio.3000728.s005.pdf [file pbio.3000728.s005.pdf]
