# Supplementary material for: Modulation of bacterial multicellularity via spatio-specific polysaccharide secretion
Source: PubMed Central journal article supplement (PMC7310880; doi:10.1371/journal.pbio.3000728), 2020-06-09
Supplement: pbio.3000728.s006.pdf [file pbio.3000728.s006.pdf]

| <b>S1 Table: Gene nomenclature and annotation analyses</b> |                                      |                  |                            |             |                                                         |                                                                         |                        |                           |
|------------------------------------------------------------|--------------------------------------|------------------|----------------------------|-------------|---------------------------------------------------------|-------------------------------------------------------------------------|------------------------|---------------------------|
| <b>Gene Name</b>                                           | <b>Former Name [Ref]</b>             | <b>Locus Tag</b> | <b>Protein Length (aa)</b> | <b>TMS†</b> | <b>Fold Recognition Hit (PDB)*</b>                      | <b>Name of PDB Homologue</b>                                            | <b>Probability (%)</b> | <b>E-value</b>            |
| <i>wzxX</i>                                                | –                                    | <i>mxan_7416</i> | 490                        | 14          | 5T77_A                                                  | MOP-family lipid II flippase MurJ                                       | 100                    | 1.3E-31                   |
| <i>wzyX</i>                                                | <i>sgnF</i> [1]                      | <i>mxan_7442</i> | 508                        | 12          | 6BAR_A                                                  | Peptidoglycan glycosyltransferase RodA                                  | 98.66                  | 3.3E-6                    |
| <i>wzcX</i>                                                | <i>epsV</i> [1,2]                    | <i>mxan_7421</i> | 507                        | 2           | 4WL1_X                                                  | Polysaccharide co-polymerase WzzE                                       | 99.9                   | 1.3E-24                   |
| <i>wzeX</i>                                                | –                                    | <i>mxan_7447</i> | 186                        | –           | 3CIO_D                                                  | Tyrosine-protein kinase Etk, C-terminal Wzc domain                      | 99.41                  | 9.1E-14                   |
| <i>wzaX</i>                                                | <i>epsY</i> [1]                      | <i>mxan_7417</i> | 219                        | –           | 2J58_B                                                  | Outer-membrane lipoprotein Wza                                          | 100.0                  | 1.3E-32                   |
| <i>wzxS</i>                                                | <i>exoM</i> [3]                      | <i>mxan_3260</i> | 506                        | 14          | 5T77_A                                                  | MOP-family lipid II flippase MurJ                                       | 100                    | 2.9E-33                   |
| <i>wzyS</i>                                                | <i>exoJ</i> [3]                      | <i>mxan_3026</i> | 426                        | 12          | 6BAR_A                                                  | Peptidoglycan glycosyltransferase RodA                                  | 98.75                  | 6.2E-7                    |
| <i>wzcS</i>                                                | <i>exoC</i> [4]                      | <i>mxan_3227</i> | 465                        | 2           | 4WL1_X                                                  | Polysaccharide co-polymerase WzzE                                       | 99.93                  | 7.0E-27                   |
| <i>wzeS</i>                                                | <i>btkA</i> [5]<br><i>exoD</i> [6]   | <i>mxan_3228</i> | 231                        | –           | 3LA6_D                                                  | Nucleotide-binding domain of Tyr-protein kinase Wzc                     | 99.9                   | 9.3E-24                   |
| <i>wzaS</i>                                                | <i>fdgA</i> [7]<br><i>exoA</i> [4,6] | <i>mxan_3225</i> | 190                        | –           | 2J58_B                                                  | Outer-membrane lipoprotein Wza                                          | 100.0                  | 4.4E-32                   |
| <i>wzxB</i>                                                | – [4]                                | <i>mxan_1035</i> | 506                        | 14          | 5T77_A                                                  | MOP-family lipid II flippase MurJ                                       | 100                    | 1.8E-33                   |
| <i>wzyB</i>                                                | –                                    | <i>mxan_1028</i> | 486                        | 12          | 6BAR_A                                                  | Peptidoglycan glycosyltransferase RodA                                  | 98.89                  | 2.7E-7                    |
| <i>wzcB</i>                                                | <i>btkB</i> [8]                      | <i>mxan_1025</i> | 710                        | 2           | i) aa 2 – 391:<br>4WL1_X<br>ii) aa 432 – 697:<br>3CIO_D | i) Polysaccharide co-polymerase WzzE<br>ii) Tyrosine-protein kinase Etk | i) 99.88<br>ii) 99.92  | i) 6.2E-24<br>ii) 6.7E-26 |
| <i>wzaB</i>                                                | – [9]                                | <i>mxan_1915</i> | 204                        | –           | 2J58_B                                                  | Outer-membrane lipoprotein Wza                                          | 99.95                  | 1.1E-29                   |

†Consensus of OCTOPUS and TMHMM analyses. \*Output from HHpred

- [1] Youderian P, Hartzell PL. Transposon insertions of *magellan-4* that impair social gliding motility in *Myxococcus xanthus*. *Genetics*. 2006. 172(3):1397-1410.
- [2] Lu A, Cho K, Black WP, Duan X-Y, Lux R, Yang Z, Kaplan HB, Zusman DR, Shi W. Exopolysaccharide biosynthesis genes required for social motility in *Myxococcus xanthus*. *Mol. Microbiol.* 2005. 55(1):206-220.
- [3] Pérez-Burgos M, García-Romero I, Valvano MA, Søgaaard-Andersen L. Identification of the Wzx flippase, Wzy polymerase and sugar-modifying enzymes for spore coat polysaccharide biosynthesis in *Myxococcus xanthus*. *Mol. Microbiol.* 2020. (advance online). DOI: 10.1111/mmi.14486.
- [4] Müller FD, Schink CW, Hoiczky E, Cserti E, Higgs PI. Spore formation in *Myxococcus xanthus* is tied to cytoskeleton functions and polysaccharide spore coat deposition. *Mol. Microbiol.* 2012. 83(3):486-505.
- [5] Kimura Y, Yamashita S, Mori Y, Kitajima Y, Takegawa K. A *Myxococcus xanthus* bacterial tyrosine kinase, BtkA, is required for the formation of mature spores. *J. Bacteriol.* 2011. 193(20):5853-5857.
- [6] Holkenbrink C, Hoiczky E, Kahnt J, Higgs PI. Synthesis and assembly of a novel glycan layer in *Myxococcus xanthus* spores. *J. Biol. Chem.* 2014. 289(46):32364-32378.
- [7] Ueki T, Inouye S. Identification of a gene involved in polysaccharide export as a transcription target of FruA, an essential factor for *Myxococcus xanthus* development. *J. Biol. Chem.* 2005. 280(37):32279-32284.
- [8] Kimura Y, Kato T, Mori Y. Function analysis of a bacterial tyrosine kinase, BtkB, in *Myxococcus xanthus*. *FEMS Microbiol. Lett.* 2012. 336(1):45-51.
- [9] Ducret A, Valignat M-P, Mouhamar F, Mignot T, Theodoly O. Wet-surface-enhanced ellipsometric contrast microscopy identifies slime as a major adhesion factor during bacterial surface motility. *Proc. Natl. Acad. Sci. USA.* 2012. 109(25):10036-10041.
