# Supplementary material for: Modulation of bacterial multicellularity via spatio-specific polysaccharide secretion
Source: PubMed Central journal article supplement (PMC7310880; doi:10.1371/journal.pbio.3000728), 2020-06-09
Supplement: pbio.3000728.s008.pdf [file pbio.3000728.s008.pdf]

**S3 Table: Bacterial strains and plasmids used in this study**

| Strain Code | Strain                                              | Genotype                                                                               | Construction                                                    | Source or Reference   |
|-------------|-----------------------------------------------------|----------------------------------------------------------------------------------------|-----------------------------------------------------------------|-----------------------|
| TM108       | <i>Myxococcus xanthus</i> DZ2                       | Wild type                                                                              | -                                                               | Laboratory collection |
| EM606       | $\Delta wzxX$                                       | $\Delta mxan_{7416}$                                                                   | TM108 + pEM440 (pBJ113- $\Delta mxan_{7416}$ )                  | This work             |
| EM616       | $\Delta wzyX$                                       | $\Delta mxan_{7442}$                                                                   | TM108 + pEM470 (pBJ113- $\Delta mxan_{7442}$ )                  | This work             |
| EM572       | $\Delta wzcX$                                       | $\Delta mxan_{7421/epsV}$                                                              | TM108 + pEM441 (pBJ113- $\Delta mxan_{7421}$ )                  | This work             |
| EM614       | $\Delta wzeX$                                       | $\Delta mxan_{7447}$                                                                   | TM108 + pEM468 (pBJ113- $\Delta mxan_{7447}$ )                  | This work             |
| TM469       | $\Delta wzaX$                                       | $\Delta mxan_{7417/epsY}$                                                              | TM108 + pTM211 (pBJ114- $\Delta mxan_{7417}$ )                  | [1]                   |
| TM484       | $\Delta wzaS$                                       | $\Delta mxan_{3225/exoA/fdgA}$                                                         | TM108 + pTM210 (pBJ114- $\Delta mxan_{3225}$ )                  | [1]                   |
| EM619       | $\Delta wzxB$                                       | $\Delta mxan_{1035}$                                                                   | TM108 + pEM471 (pBJ113- $\Delta mxan_{1035}$ )                  | This work             |
| EM618       | $\Delta wzyB$                                       | $\Delta mxan_{1028}$                                                                   | TM108 + pEM472 (pBJ113- $\Delta mxan_{1028}$ )                  | This work             |
| EM588       | $\Delta wzcB$                                       | $\Delta mxan_{1025/btkB}$                                                              | TM108 + pEM462 (pBJ113- $\Delta mxan_{1025}$ )                  | This work             |
| EM615       | $\Delta wzcB_{BYK}$                                 | $\Delta mxan_{1025}$ bp 1392-2091 (BYK domain)                                         | TM108 + pEM469 (pBJ113- $\Delta mxan_{1025}$ from aa 465-697)   | This work             |
| TM529       | $\Delta wzaB$                                       | $\Delta mxan_{1915}$                                                                   | TM108 + pTM212 (pBJ114- $\Delta mxan_{1915}$ )                  | [1]                   |
| EM596       | $\Delta wzcX \Delta wzaX$                           | $\Delta mxan_{7417} \Delta mxan_{7421}$                                                | TM469 + pEM441                                                  | This work             |
| EM592       | $\Delta wzaX \Delta wzaB$                           | $\Delta mxan_{7417} \Delta mxan_{1915}$                                                | TM469 + pTM211                                                  | This work             |
| EM591       | $\Delta wzcB \Delta wzaB$                           | $\Delta mxan_{1025} \Delta mxan_{1915}$                                                | TM529 + pEM462                                                  | This work             |
| EM651       | $\Delta wzaB \Delta wzaS$                           | $\Delta mxan_{1915} \Delta mxan_{3225}$                                                | TM529 + pTM210                                                  | This work             |
| TM488       | $\Delta wzaX \Delta wzaS$                           | $\Delta mxan_{7417} \Delta mxan_{3225}$                                                | TM469 + pTM210                                                  | This work             |
| TM530       | $\Delta wzaX \Delta wzaB \Delta wzaS$               | $\Delta mxan_{7417} \Delta mxan_{1915} \Delta mxan_{3225}$                             | TM488 + pTM212 (pBJ114- $\Delta mxan_{1915}$ )                  | This work             |
| TM293       | $\Omega pilA$                                       | Tetracycline resistance cassette                                                       | TM108 + <i>pilA::tet</i> , Tcr                                  | Laboratory collection |
| TM493       | $\Delta wzaX \Omega pilA$                           | $\Delta mxan_{7417} \Omega pilA$                                                       | TM469 + $\Omega pilA$ chromosomal DNA                           | This work             |
| TM540       | $\Delta wzaB \Omega pilA$                           | $\Delta mxan_{1915} \Omega pilA$                                                       | TM529 + $\Omega pilA$ chromosomal DNA                           | This work             |
| EM693       | $\Delta wzaX$ OMss-sfGFP                            | $\Delta mxan_{7417}$ OMss-sfGFP                                                        | TM469 + pSWU19- <i>promPilA-OMss-sfGFP</i>                      | This work             |
| EM691       | $\Delta wzaB$ IMss-mCherry                          | $\Delta mxan_{1915}$ IMss-mCherry                                                      | TM529 + pSWU19- <i>promPilA-IMss-mCherry</i>                    | This work             |
| EM709       | P <sub>EPS</sub> -sfGFP + P <sub>BPS</sub> -mCherry | WT P <sub>EPS</sub> -sfGFP + P <sub>BPS</sub> -mCherry                                 | TM108 + pSWU19- <i>promWzxX-sfGFP</i> + <i>promWzcB-mCherry</i> | This work             |
| EC393       | <i>Escherichia coli</i> MG1655                      | F <sup>-</sup> <i>lambda</i> <sup>-</sup> <i>ilvG</i> <sup>-</sup> <i>rfb-50 rph-1</i> | -                                                               | Laboratory collection |

[1] Ducret A, Valignat M-P, Mouhamar F, Mignot T, Theodoly O. Wet-surface-enhanced ellipsometric contrast microscopy identifies slime as a major adhesion factor during bacterial surface motility. Proc. Natl. Acad. Sci. USA. 2012. 109(25):10036-10041.
